# Supplementary material for: Ovarian Pregnancy: 2 Case Reports and a Systematic Review
Source: MDPI journal article supplement (doi:10.3390/jcm12031138), 2023-02-01
Supplement: s1 [file s1]

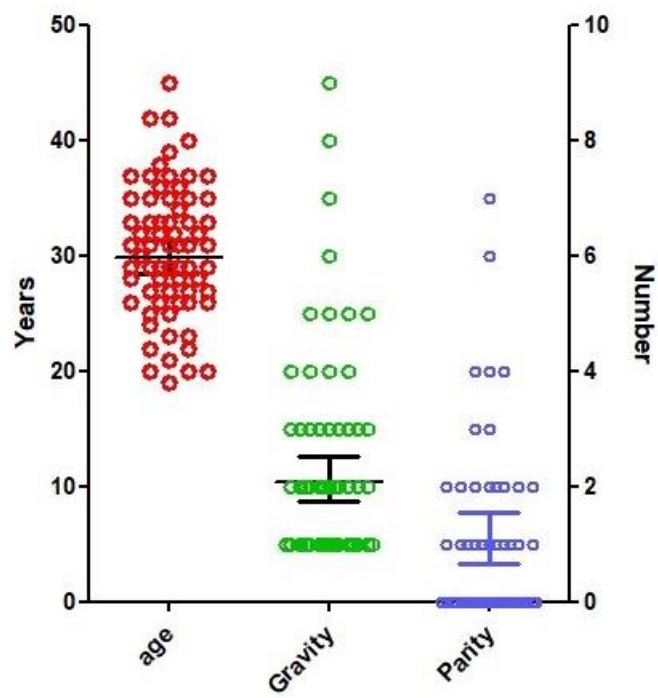

**Figure S1:** Age, parity and gravity of women with an ovarian pregnancy. Geometric means and confidence limits are indicated.
